# Supplementary material for: Halide-dependent humidity sensing of Cs2SnX6 (X = Cl, Br, I) perovskites for real-time human physiological moisture detection
Source: Royal Society of Chemistry journal article supplement (doi:10.1039/d4tc01463d), 2024-01-01
Supplement: d4tc01463d1.pdf [file d4tc01463d1.pdf]

## Electronic Supplementary Information

### Halide-dependent humidity sensing of Cs<sub>2</sub>SnX<sub>6</sub> (X = Cl, Br, I) perovskites for real-time human physiological moisture detection

Chen-Chen Guo <sup>a1</sup>, Chao-Jie Wang <sup>a1</sup>, Le-Xi Zhang <sup>a\*</sup>, Qi-Da Qiu <sup>a</sup>, Meng-Ya Zhu <sup>b</sup>,  
Jing Yin <sup>c</sup>, Li-Jian Bie <sup>a\*</sup>

<sup>a</sup> School of Materials Science and Engineering, Tianjin Key Lab for Photoelectric Materials and Devices, Key Laboratory of Display Materials and Photoelectric Devices (Ministry of Education), National Demonstration Center for Experimental Function Materials Education, Tianjin University of Technology, Tianjin 300384, China

<sup>b</sup> School of Electronics and Information Engineering, Tianjin Key Laboratory of Electronic Materials and Devices, Hebei University of Technology, Tianjin 300401, China

<sup>c</sup> School of Environmental Science and Safety Engineering, Tianjin University of Technology, Tianjin 300384, China

\* Corresponding authors:

**Le-Xi Zhang**, Tel./Fax: +86 022 60214028. E-Mail: lxzhang@tjut.edu.cn.

**Li-Jian Bie**, Tel./Fax: +86 022 60215508. E-Mail: ljbie@tjut.edu.cn.

<sup>1</sup> These two authors as co-first authors contribute equally to this work.

## Section S1. Sensor measurement

All characteristic curves of humidity sensing were measured on a CHS-1 Humidity Sensing Analysis System (Beijing Elite Tech. Co. Ltd. China) at room temperature. The voltage in the humidity test was an alternating current (AC) of 1 V, and the testing frequency varied from 10 Hz to  $10^5$  Hz. The relative humidity (RH) gradient was achieved at room temperature ( $\sim 20$  °C) using different saturated salt solutions of LiCl (11%),  $\text{MgCl}_2$  (33%),  $\text{Mg}(\text{NO}_3)_2$  (54%), NaCl (75%), KCl (85%) and  $\text{K}_2\text{SO}_4$  (97%), respectively.

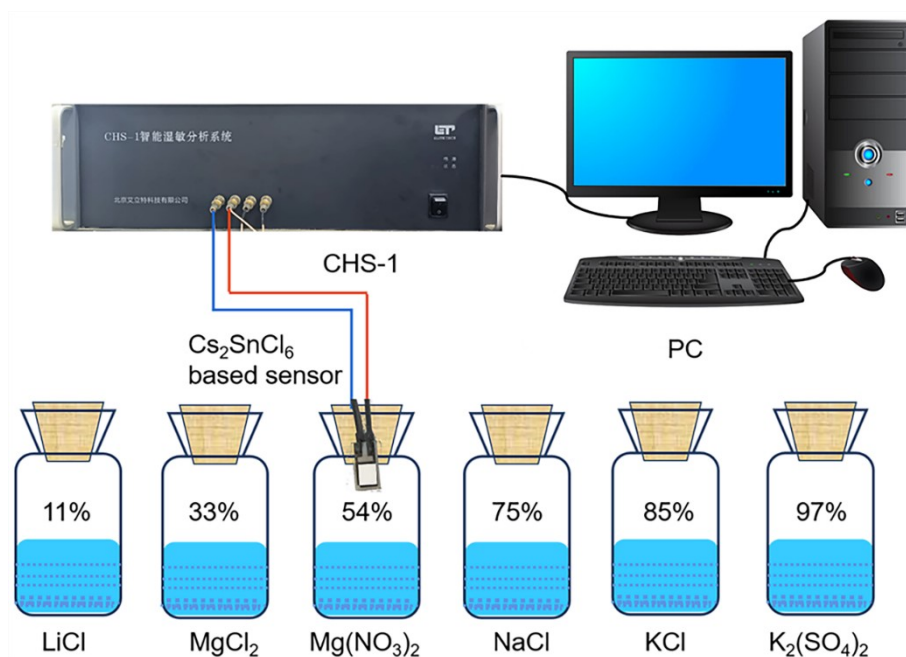

**Fig. S1.** Flowchart for moisture sensing test.

## Section S2. Limit of detection and tolerance factor

The limit of detection (LOD) is calculated by Eq. S1, where  $y$  is the response under air humidity,  $y_i$  is the average response,  $N$  is the number of points, and  $k$  is the slope of linear fitting of response at different humidity, respectively.

$$\text{LOD} = 3[\sum(y_i - y)^2/N]^{1/2}/k \quad (\text{S1})$$

The tolerance factor ( $t$ ) of  $\text{Cs}_2\text{SnCl}_6$ ,  $\text{Cs}_2\text{SnBr}_6$  and  $\text{Cs}_2\text{SnI}_6$  can be calculated by Eq. S2, where  $r_A$ ,  $r_B$ , and  $r_X$  correspond to the radii of Cs and Sn cations, as well as Cl, Br and I anions, respectively.

$$t = \frac{(r_A + r_X)}{(\sqrt{2} * (r_B + r_X))} \quad (\text{S2})$$

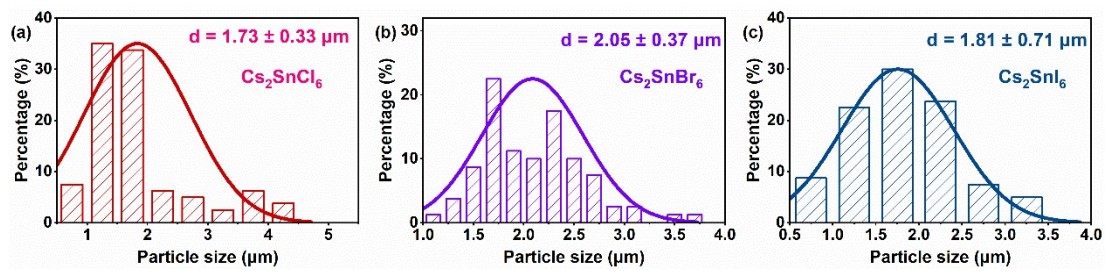

**Fig. S2.** Particle size distributions of (a)  $\text{Cs}_2\text{SnCl}_6$ , (b)  $\text{Cs}_2\text{SnBr}_6$  and (c)  $\text{Cs}_2\text{SnI}_6$ , respectively.

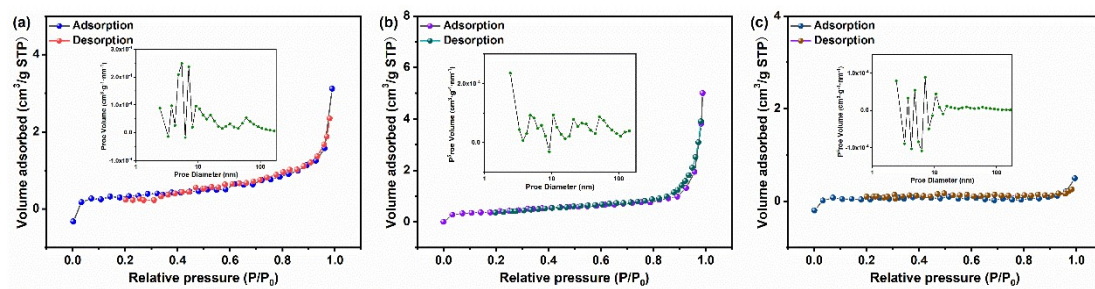

**Fig. S3.** Typical N<sub>2</sub> absorption-desorption isotherms of (a) Cs<sub>2</sub>SnCl<sub>6</sub>, (b) Cs<sub>2</sub>SnBr<sub>6</sub> and (c) Cs<sub>2</sub>SnI<sub>6</sub>, respectively. Insets in (a-c): pore size distribution.

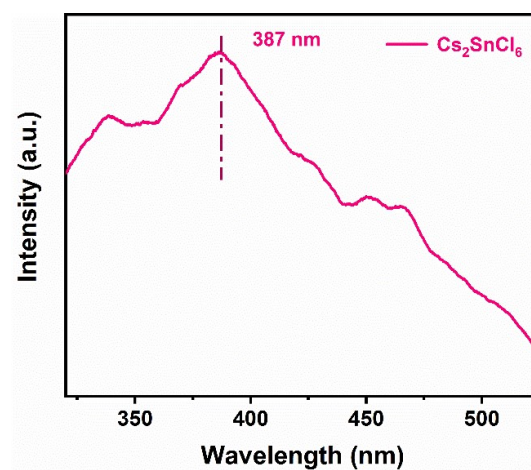

**Fig. S4.** PL spectrum of  $\text{Cs}_2\text{SnCl}_6$ .

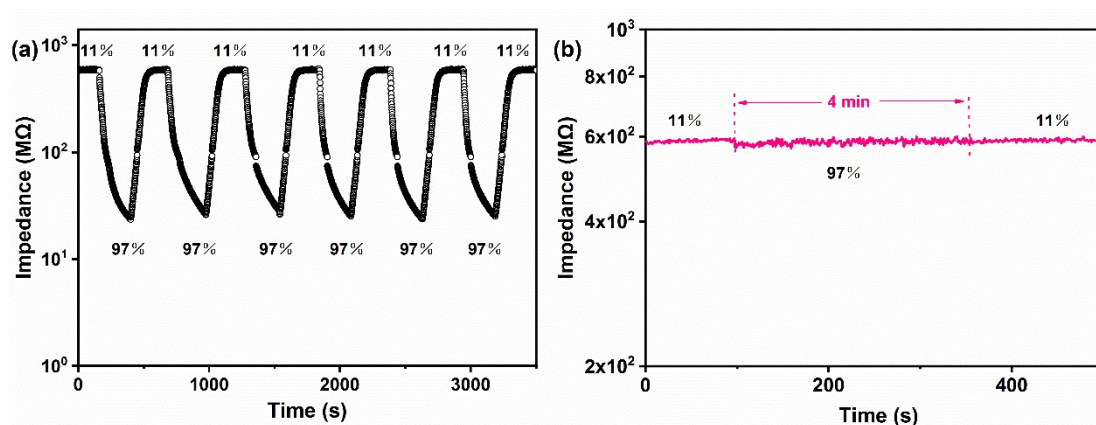

**Fig. S5.** Real-time impedance changes of (a) a blank  $\text{Al}_2\text{O}_3$  substrate without a  $\text{Cs}_2\text{SnX}_6$  layer and (b) the substrate covered with a non-conductive colloidal coating.

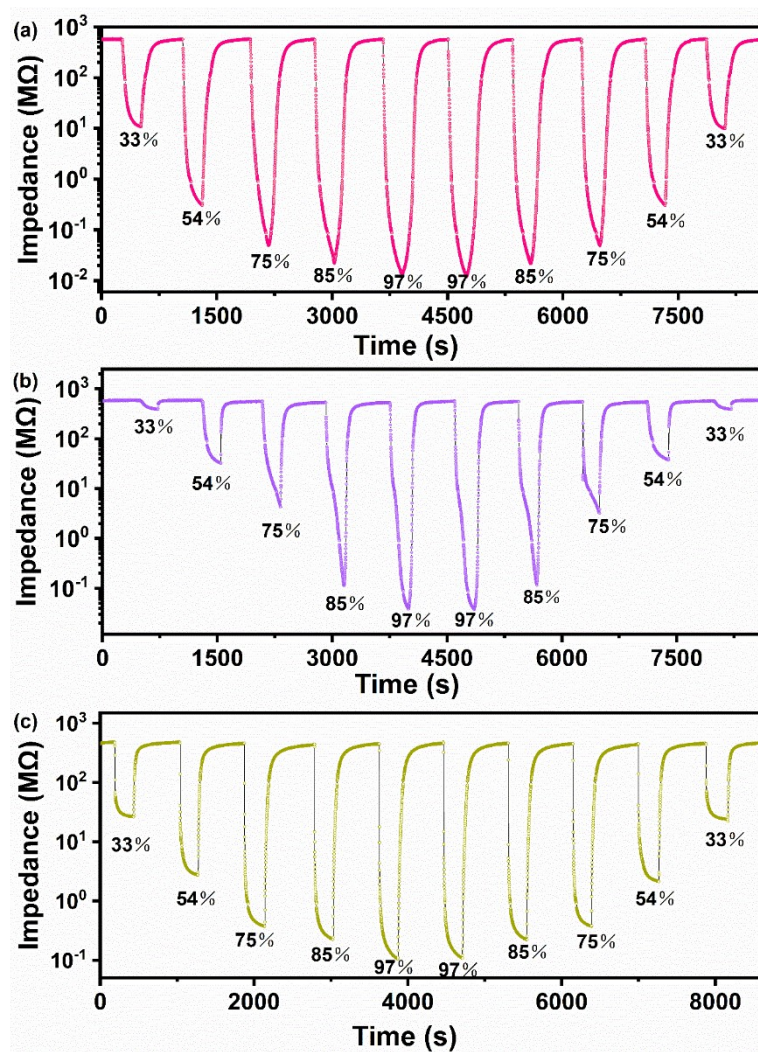

**Fig. S6.** Dynamic wetting-drying curves of (a)  $\text{Cs}_2\text{SnCl}_6$ , (b)  $\text{Cs}_2\text{SnBr}_6$  and (c)  $\text{Cs}_2\text{SnI}_6$ , respectively.



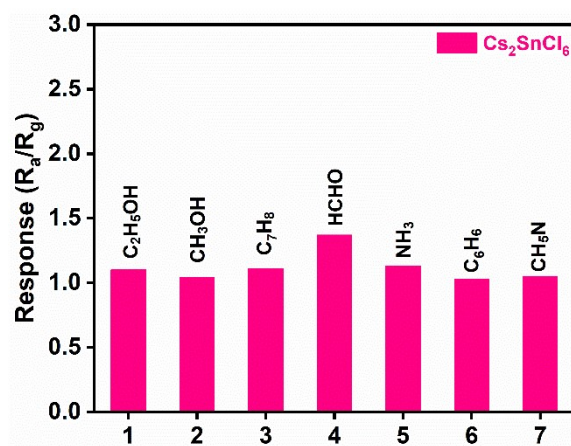

**Fig. S7.** Response diagram of the  $Cs_2SnCl_6$  sensor to 200 ppm different gases at room temperature.

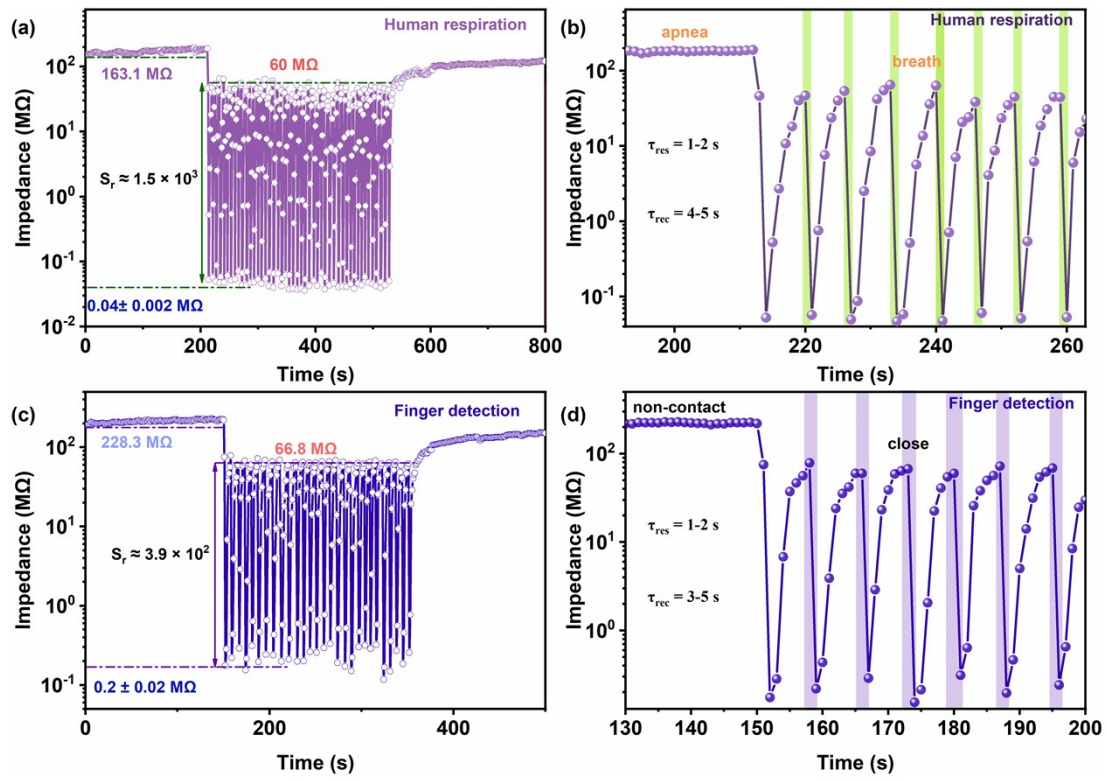

**Fig. S8.** The dynamic impedance and enlarged curves of monitoring (a, b) human respiration and (c, d) water evaporation from the finger using the  $\text{Cs}_2\text{SnBr}_6$  sensor.

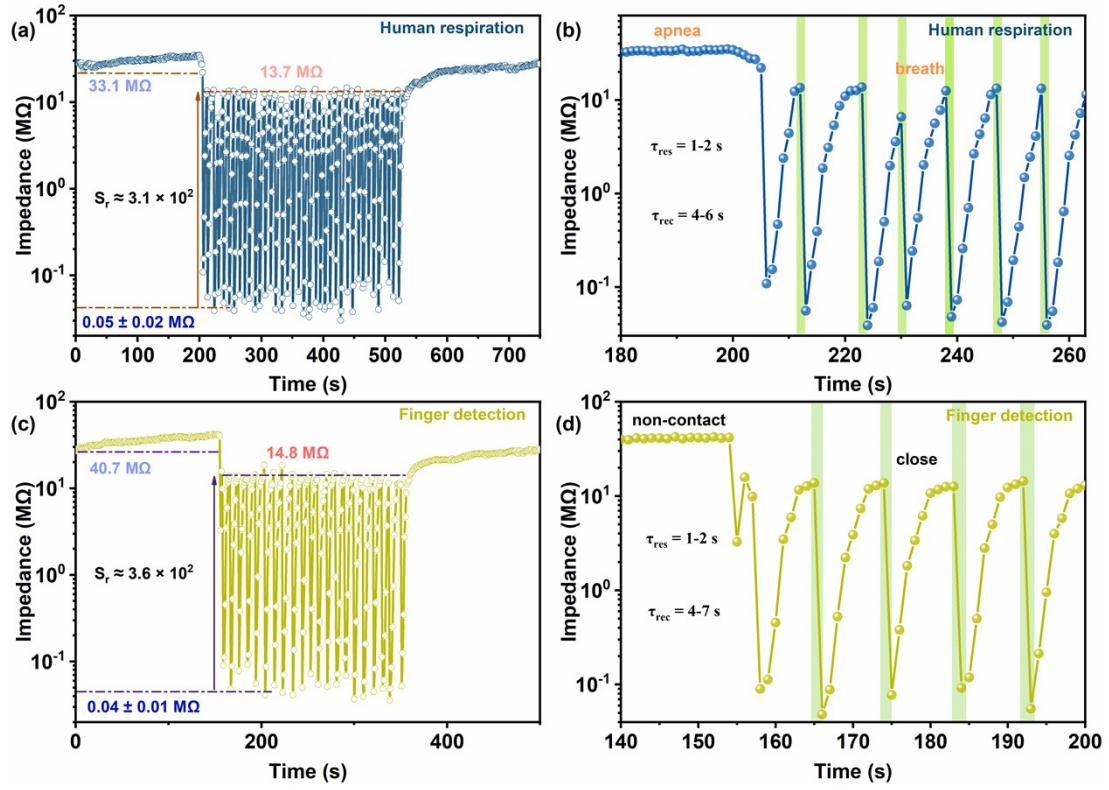

**Fig. S9.** The dynamic impedance and enlarged curves of monitoring (a, b) human respiration and (c, d) water evaporation from the finger using the  $\text{Cs}_2\text{SnI}_6$  sensor.
